# Supplementary material for: SARS-CoV-2 seroprevalence among people living with HIV in the German HIV-1 Seroconverter Cohort, 2020–2022
Source: PubMed Central journal article supplement (PMC11529177; doi:10.1186/s12879-024-10119-3), 2024-11-01
Supplement: 12879_2024_10119_MOESM2_ESM.pdf [file 12879_2024_10119_MOESM2_ESM.pdf]

**Additional file 2 : Characteristics of monthly patient samples.**

|                  | Samples     | Male        | %           | Female     | %          | Oth/Unkn Sex | %          | MSM         | %           | PWID      | %          | HET        | %          | Oth/Unkn Tr | %          |
|------------------|-------------|-------------|-------------|------------|------------|--------------|------------|-------------|-------------|-----------|------------|------------|------------|-------------|------------|
| Jan-20           | 126         | 120         | 95.2        | 5          | 4.0        | 1            | 0.8        | 113         | 89.7        | 0         | 0.0        | 8          | 6.3        | 5           | 4.0        |
| Feb-20           | 106         | 102         | 96.2        | 4          | 3.8        | 0            | 0.0        | 90          | 84.9        | 0         | 0.0        | 9          | 8.5        | 7           | 6.6        |
| Mar-20           | 93          | 90          | 96.8        | 3          | 3.2        | 0            | 0.0        | 85          | 91.4        | 3         | 3.2        | 3          | 3.2        | 2           | 2.2        |
| Apr-20           | 97          | 93          | 95.9        | 4          | 4.1        | 0            | 0.0        | 89          | 91.8        | 0         | 0.0        | 4          | 4.1        | 4           | 4.1        |
| May-20           | 81          | 76          | 93.8        | 4          | 4.9        | 1            | 1.2        | 71          | 87.7        | 0         | 0.0        | 8          | 9.9        | 2           | 2.5        |
| Jun-20           | 118         | 112         | 94.9        | 5          | 4.2        | 1            | 0.8        | 105         | 89.0        | 2         | 1.7        | 7          | 5.9        | 4           | 3.4        |
| Jul-20           | 190         | 181         | 95.3        | 9          | 4.7        | 0            | 0.0        | 158         | 83.2        | 3         | 1.6        | 19         | 10.0       | 10          | 5.3        |
| Aug-20           | 126         | 116         | 92.1        | 9          | 7.1        | 1            | 0.8        | 107         | 84.9        | 1         | 0.8        | 15         | 11.9       | 3           | 2.4        |
| Sep-20           | 93          | 83          | 89.2        | 7          | 7.5        | 3            | 3.2        | 78          | 83.9        | 1         | 1.1        | 11         | 11.8       | 3           | 3.2        |
| Oct-20           | 106         | 101         | 95.3        | 4          | 3.8        | 1            | 0.9        | 97          | 91.5        | 0         | 0.0        | 8          | 7.5        | 1           | 0.9        |
| Nov-20           | 73          | 71          | 97.3        | 2          | 2.7        | 0            | 0.0        | 63          | 86.3        | 1         | 1.4        | 6          | 8.2        | 3           | 4.1        |
| Dec-20           | 58          | 55          | 94.8        | 2          | 3.4        | 1            | 1.7        | 50          | 86.2        | 0         | 0.0        | 6          | 10.3       | 2           | 3.4        |
| Jan-21           | 103         | 96          | 93.2        | 5          | 4.9        | 2            | 1.9        | 91          | 88.3        | 1         | 1.0        | 7          | 6.8        | 4           | 3.9        |
| Feb-21           | 95          | 94          | 98.9        | 1          | 1.1        | 0            | 0.0        | 83          | 87.4        | 0         | 0.0        | 7          | 7.4        | 5           | 5.3        |
| Mar-21           | 85          | 79          | 92.9        | 5          | 5.9        | 1            | 1.2        | 74          | 87.1        | 1         | 1.2        | 3          | 3.5        | 7           | 8.2        |
| Apr-21           | 96          | 91          | 94.8        | 4          | 4.2        | 1            | 1.0        | 81          | 84.4        | 0         | 0.0        | 10         | 10.4       | 5           | 5.2        |
| May-21           | 94          | 87          | 92.6        | 7          | 7.4        | 0            | 0.0        | 80          | 85.1        | 1         | 1.1        | 8          | 8.5        | 5           | 5.3        |
| Jun-21           | 97          | 95          | 97.9        | 2          | 2.1        | 0            | 0.0        | 91          | 93.8        | 0         | 0.0        | 4          | 4.1        | 2           | 2.1        |
| Jul-21           | 169         | 155         | 91.7        | 12         | 7.1        | 2            | 1.2        | 141         | 83.4        | 3         | 1.8        | 16         | 9.5        | 9           | 5.3        |
| Aug-21           | 105         | 97          | 92.4        | 8          | 7.6        | 0            | 0.0        | 87          | 82.9        | 1         | 1.0        | 12         | 11.4       | 5           | 4.8        |
| Sep-21           | 74          | 71          | 95.9        | 3          | 4.1        | 0            | 0.0        | 67          | 90.5        | 0         | 0.0        | 6          | 8.1        | 1           | 1.4        |
| Oct-21           | 93          | 88          | 94.6        | 4          | 4.3        | 1            | 1.1        | 84          | 90.3        | 0         | 0.0        | 8          | 8.6        | 1           | 1.1        |
| Nov-21           | 69          | 66          | 95.7        | 2          | 2.9        | 1            | 1.4        | 64          | 92.8        | 0         | 0.0        | 3          | 4.3        | 2           | 2.9        |
| Dec-21           | 34          | 32          | 94.1        | 2          | 5.9        | 0            | 0.0        | 30          | 88.2        | 0         | 0.0        | 2          | 5.9        | 2           | 5.9        |
| Jan-22           | 98          | 92          | 93.9        | 3          | 3.1        | 3            | 3.1        | 91          | 92.9        | 0         | 0.0        | 5          | 5.1        | 2           | 2.0        |
| Feb-22           | 84          | 82          | 97.6        | 2          | 2.4        | 0            | 0.0        | 74          | 88.1        | 2         | 2.4        | 4          | 4.8        | 4           | 4.8        |
| Mar-22           | 66          | 64          | 97.0        | 2          | 3.0        | 0            | 0.0        | 62          | 93.9        | 0         | 0.0        | 2          | 3.0        | 2           | 3.0        |
| Apr-22           | 66          | 60          | 90.9        | 6          | 9.1        | 0            | 0.0        | 57          | 86.4        | 0         | 0.0        | 7          | 10.6       | 2           | 3.0        |
| May-22           | 79          | 76          | 96.2        | 3          | 3.8        | 0            | 0.0        | 71          | 89.9        | 1         | 1.3        | 2          | 2.5        | 5           | 6.3        |
| Jun-22           | 84          | 78          | 92.9        | 5          | 6.0        | 1            | 1.2        | 73          | 86.9        | 0         | 0.0        | 6          | 7.1        | 5           | 6.0        |
| Jul-22           | 110         | 105         | 95.5        | 5          | 4.5        | 0            | 0.0        | 99          | 90.0        | 1         | 0.9        | 6          | 5.5        | 4           | 3.6        |
| Aug-22           | 121         | 113         | 93.4        | 7          | 5.8        | 1            | 0.8        | 95          | 78.5        | 1         | 0.8        | 16         | 13.2       | 9           | 7.4        |
| Sep-22           | 82          | 79          | 96.3        | 2          | 2.4        | 1            | 1.2        | 75          | 91.5        | 0         | 0.0        | 4          | 4.9        | 3           | 3.7        |
| Oct-22           | 74          | 71          | 95.9        | 3          | 4.1        | 0            | 0.0        | 66          | 89.2        | 1         | 1.4        | 3          | 4.1        | 4           | 5.4        |
| Nov-22           | 64          | 61          | 95.3        | 3          | 4.7        | 0            | 0.0        | 56          | 87.5        | 0         | 0.0        | 6          | 9.4        | 2           | 3.1        |
| Dec-22           | 36          | 35          | 97.2        | 1          | 2.8        | 0            | 0.0        | 31          | 86.1        | 1         | 2.8        | 3          | 8.3        | 1           | 2.8        |
| <b>2020-2022</b> | <b>3345</b> | <b>3167</b> | <b>94.7</b> | <b>155</b> | <b>4.6</b> | <b>23</b>    | <b>0.7</b> | <b>2929</b> | <b>87.6</b> | <b>25</b> | <b>7.5</b> | <b>254</b> | <b>0.7</b> | <b>137</b>  | <b>4.1</b> |

Abbreviations: Oth, Other; Unkn, Unknown; Tr, Transmission; MSM, men who have sex with men; PWID, persons who inject drugs; HET, heterosexual transmission.
